# Supplementary material for: Inhibitory Effects of Laminaria japonica Fucoidans Against Noroviruses
Source: PubMed Central journal article supplement (PMC7552056; doi:10.3390/v12090997), 2020-09-07
Supplement: viruses-12-00997-s001.pdf [file viruses-12-00997-s001.pdf]

1 Article

2 **Supplementary Materials: Inhibitory effects of**  
 3 ***Laminaria japonica* fucoidans against noroviruses**

4 Hyojin Kim, Chae Yeon Lim, Dan Bi Lee, Jong Hyeon Seok, Kyung Hyun Kim and Mi Sook  
 5 Chung

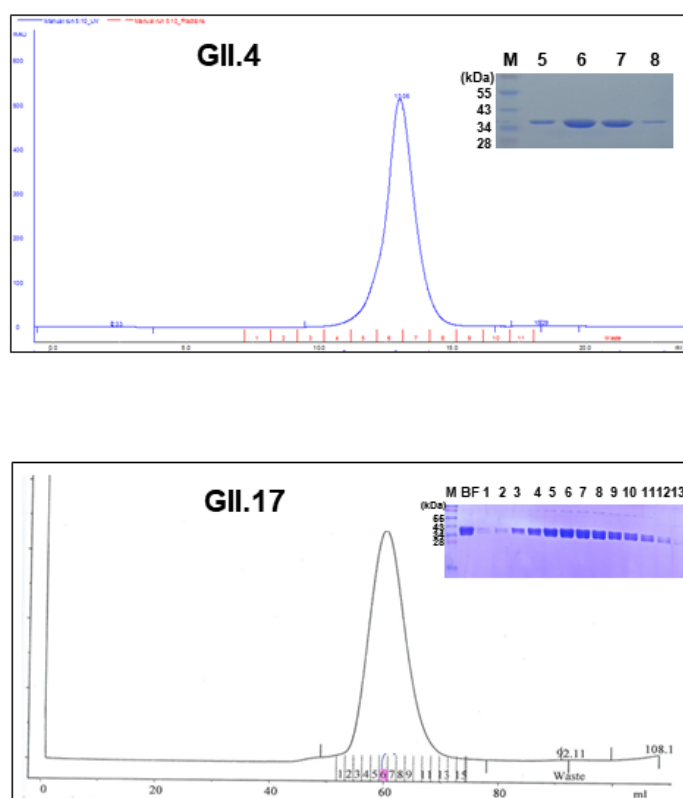

6 **Figure S1.** Preparation of the HuNoV GII.4 and GII.17 P domains. The recombinant P domains were  
 7 purified by Ni-NTA affinity and size exclusion chromatography and analysed by SDS-PAGE (inset).

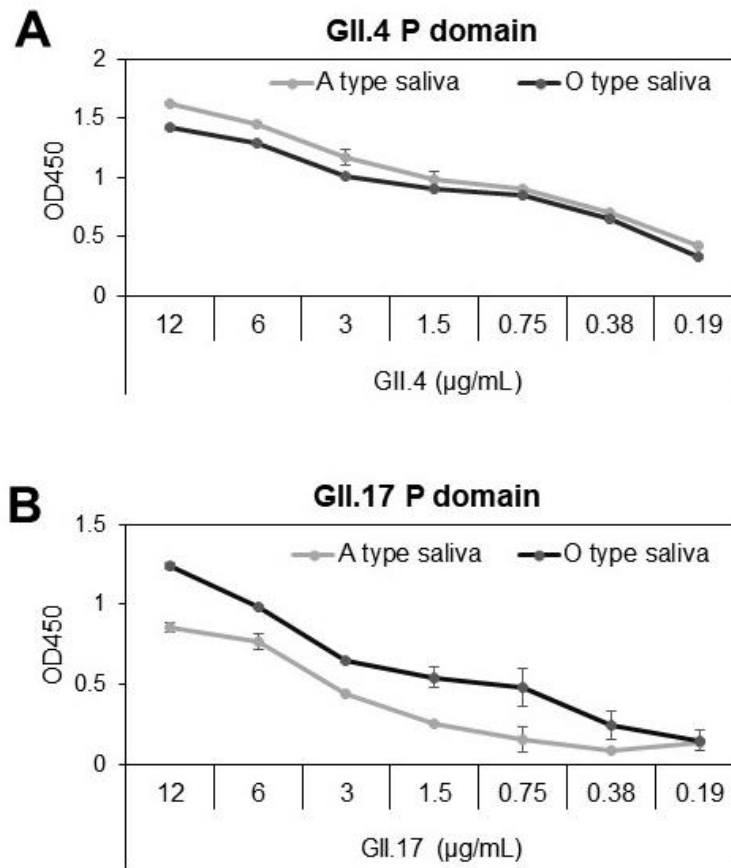

8 **Figure S2.** Binding of the HuNoV P domains to saliva. Binding of the HuNoV GII.4 (A) and GII.17  
9 (B) P domains to A- or O-type saliva was determined using ELISA. All experiments were performed  
10 in triplicate. Standard deviation is shown with black bars. The P domains were shown to bind to A-  
11 and O-type saliva in a dose-dependent manner.

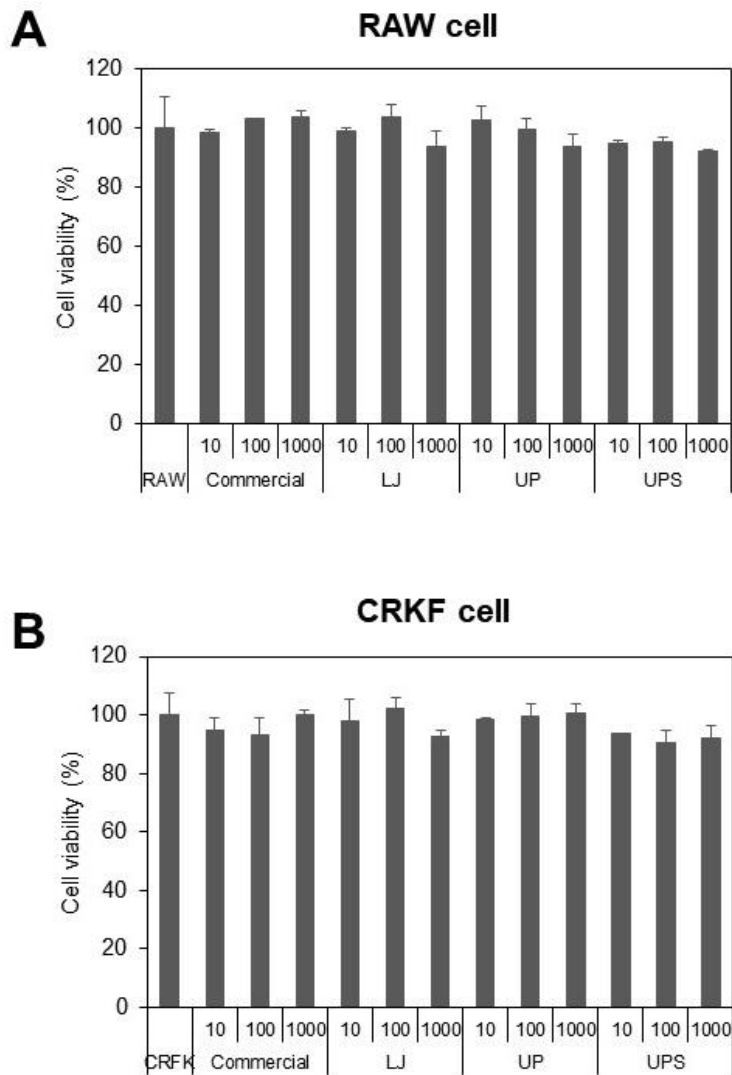

12 **Figure S3.** Cytotoxicity of the fucoidans of *Laminaria japonica* (LJ), *Undaria pinnatifida* (UP), and  
 13 *Undaria pinnatifida* sporophyll (UPS). Cytotoxicity was measured by MTT assay. **(A)** RAW or **(B)**  
 14 CRFK cells were treated with the fucoidans of LJ, UP, and UPS for 24 h, respectively. A commercial  
 15 fucoidan ( $\geq 95\%$  purity) was used as a positive control. The percentage of cell viability was  
 16 calculated as follows:  $\% \text{ cell viability} = (\text{Abs}_{\text{treatment}} / \text{Abs}_{\text{control}}) \times 100$ . Significance level was indicated  
 17 by  $*p < 0.05$ . There was no significant difference in the cell viability of the fucoidan from LJ, UP, and  
 18 UPS compared to that of RAW or CRFK cell alone.

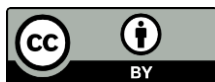

© 2020 by the authors. Submitted for possible open access publication under the terms and conditions of the Creative Commons Attribution (CC BY) license (<http://creativecommons.org/licenses/by/4.0/>).
